# Supplementary material for: How does the business environment ecosystem boost Tourism Industry Efficiency? fresh insights from a configuration perspective
Source: Research Square preprint supplement (doi:10.21203/rs.3.rs-6610247/v1), 2025-07-24
Supplement: Supplementary file 1 [file aad7891c684a5c1471b348d8.docx]

**Appendix**

1. **Detailed Supplement to the Methodology**

**1.1 fsQCA**

The QCA method was first proposed by Professor Ragin (Ragin, 2014), which views cases as combinations of conditions, going beyond the boundaries between qualitative and quantitative methods. It conducts comparative analysis at the case level to reveal the complex causal relationships between the combinations of conditions and the outcomes. The QCA method is particularly suitable for addressing three key aspects in this study:

First, as the previous analysis indicates, the elements in the business environment interact with each other, and their underlying logics are intertwined, affecting TIE. The QCA method focuses on analyzing the interdependencies and interactive effects of the antecedent conditions on the combined outcome (Ragin, 2014). It is particularly effective in explaining how the different configurations and coordination of institutional environments across regions influence the complex mechanisms of TIE.

Second, the QCA method posits that antecedent conditions can lead to outcomes through various paths and different combinations, thereby revealing how elements work together to generate differentiated institutional ecologies (combinations of business environment ecosystems). This approach helps governments choose the appropriate development path based on the specific situation of the destination (Fiss, 2011).

Third, the QCA method adheres to the concept that “cases are wholes composed of antecedent conditions,” maintaining the advantages of case study thinking while conducting comparative analysis at the case level (Ragin, 2014), ensuring the practicality and external applicability of the research conclusions.

We used fsQCA 3.0 (www.compasss.org) for the analysis, with the following steps: First, variable calibration considered three thresholds (fully consistent, crossover point, and fully inconsistent), and the calibration values ranged from [0,1]. Second, the necessity analysis used Boolean algebra to estimate consistency and coverage, focusing on whether researchers need to pay attention to specific combinations; coverage indicates the importance of a combination. If the consistency index ≥ 0.9, the condition is considered necessary. In the necessity analysis, the consistency and coverage indices are based on the following formulas:

(1)

(2)

Where *Xi* is the calibrated antecedent condition, and *Yi* is calibrated outcome condition for unit *i*.

Third, It constructed a truth table, providing all logical configurations among causal conditions and results with associated evidence levels. Finally, sufficient configurations were determined using Boolean minimization and the Quine-McCluskey algorithm. For the sufficiency analysis, the consistency and coverage index is based on the following formula:

(3)

(4)

Where *Xi* is the calibrated antecedent condition, and *Yi* is calibrated outcome condition for unit *i*

**1.2 NCA**

Necessity and sufficiency are emerging explanations for causal relationships. Necessity in causal relationships implies that without a certain cause, the result will not occur. Sufficiency in causal relationships means that the combination of certain causal conditions leads to a particular outcome (Dul, 2016). FsQCA tests only the actual necessity relationships, while NCA assesses the degree of necessity, reflecting to what extent a condition is a necessary requirement for a certain outcome (Vis and Dul, 2018). In NCA, an upper limit line is drawn at the top of the XY scatter plot, with an empty space in the upper left corner indicating that lower X values cannot achieve higher Y values. According to Dul (2016) and Torres and Godinho (2022) (Torres and Godinho, 2022), the effect size d is the percentage of the potential area observed above the upper limit line. D equals C/S, where C is the size of the upper limit area, and S is the size of the potential area of observations.fsQCA can identify necessary relationships, but it only qualitatively states whether a condition is necessary for an outcome, without quantifying the degree of necessity, that is, "to what extent a condition is necessary for an outcome." Particularly for fuzzy sets, where variations include not just “yes” or “no” but also detailed membership scores, NCA provides the potential to address this. QCA defines necessity using Boolean algebra only "in kind" (X is necessary for Y), while NCA defines necessity using linear algebra "in kind" and "in degree" (X level is necessary for Y level). Typically, NCA identifies more necessary conditions than QCA. Dül (2016a) has revealed that NCA and QCA are two independent but complementary research methods, highlighting the differences between NCA and fsQCA.

**1.3 Super-SBM Model for Unexpected Outputs**

Due to the limitations and biases caused by radial and angular selection in traditional DEA models, Tone proposed an improved DEA model, namely the SBM model (Tone, 2001). However, the aforementioned model cannot handle the comparison and ranking of provinces (cities) with relative efficiency values of 1. To address this issue and further optimize the model, the super-efficiency SBM model was proposed. We selected 30 provinces (municipalities directly under the central government) as decision-making units. The provinces have economic and statistical independence, making it easier to obtain comprehensive and reliable input and output data (Charnes et al., 1997). One of the advantages of the super-efficiency SBM model is its capability for 'multiple inputs and outputs'. According to the production function's input-output indicators, labor input, fixed asset investment, energy consumption in tourism, and tourism revenue all satisfy the requirements for normal production activities, and each of these indicators can represent the conditions of the province. The model is as follows:

(5)

Where: Assuming there are N DMUs (Decision Making Units), and each DMU is composed of inputs, *m*, desired outputs, *r1*, and undesired outputs, *r2*. *x*, *yd*, and *yu* represent the elements in the corresponding input matrix, desired output matrix, and undesired output matrix, respectively. *ρ* represents the TIE value. *λ* is a column vector.

1. **the calculation indicators for Tourism Industry Efficiency**

The measurement indicators of TIE vary depending on the research context and data availability, but they always include input and output indicators. Considering the new requirements of ecological civilization construction for high-quality tourism development, this study refers to existing research indicator systems (Guo et al., 2022; Wang et al., 2022a) and proposes the following indicator system (see Table 2).

Firstly, in terms of input indicators, labor, capital, and land are regarded as the basic production factors of tourism economic activities (Zha et al., 2020). During the study period, there were significant differences in the statistical standards for tourism labor, resulting in large data fluctuations. This study uses the number of people employed in the tertiary industry as a proxy indicator. Capital refers to the investment resources associated with tourism economic activities. In this study, it specifically refers to fixed asset investment. Due to limitations in tourism fixed asset investment data and drawing from existing research, this study uses the sum of the number of star-rated hotels, travel agencies, and weighted scenic spots as a representation of fixed asset investment. Another input indicator selected in this study is tourism energy consumption (Perch-Nielsen et al., 2010). This study estimates tourism energy consumption and carbon emissions indirectly (Becken and Patterson, 2006; Perch-Nielsen et al., 2010). Land refers to the land resources used for tourism development, such as land for building scenic spots, hotels, transportation facilities, etc. However, because tourism satellite accounts do not include tourism land, this factor is not considered in this study.

Secondly, in terms of expected output indicators, the tourism industry aims to meet tourist demand and create social and economic output. Economic output is the ideal output indicator. This study uses total tourism revenue to represent economic output. To eliminate the impact of price fluctuations, the study uses the Consumer Price Index (CPI), with 2011 as the base year, to convert total tourism revenue into constant prices. The total number of tourist arrivals is considered a proxy for social output. Additionally, tourist satisfaction is also an ideal indicator of output for a tourism destination, but due to data limitations, this indicator is not considered (Peng et al., 2017). In terms of unintended output indicators, during tourism economic activities, the emission of pollutants is inevitable when using production factors to produce goods and services. Tourism carbon emissions reflect the impact of tourism development on the ecological environment, so tourism carbon emissions are considered a negative output indicator. Following the approach in previous studies (Wang et al., 2022a), this study adopts a bottom-up measurement method.

Table 1 TIE Measurement Indicators

| Indicators | Specific target | Data resources |
| --- | --- | --- |
| Workforce input | Number of the tertiary sector workforce | *China Statistical Yearbook* |
| Fixed assets input | Number of star-rated hotels | *China Tourism Statistics Yearbook; Provincial* *Statistical Yearbook*; *Provincial Statistical Bulletin* |
| Number of travel agencies |
| Number of weighted scenic spots |
| Tourism energy input | Tourism energy consumption | the author's self-test |
| Economic benefits | Total Tourism Revenue | *China Tourism Statistics Yearbook* |
| Social benefits | Total number of visitors received | *China Tourism Statistics Yearbook* |
| Tourism Carbon Emissions | Tourism Carbon Emissions | the author's self-test |

**3.Calculation Indicators for Business Environment**

According to the "2018 China City Business Environment Report", this study uses the elements of the business environment as primary indicators (e-government services, innovation environment, human resources, financial services, market environment, and public services). These indicators are weighted based on their secondary indicators. Referring to the methodology of Li Zhijun et al. [1, 21], the utility value method is applied to nondimensionalize the measured data, so that the utility values fall within the range of [0, 1]. Specifically, the optimal value for an indicator is 1, while the worst value is 0. It should be noted that the weights for the secondary indicators are derived from existing research, as detailed in Table 2.。

Table 2 Business Environment Measurement Indicators

| Primary indicators | Secondary indicators | Data source |
| --- | --- | --- |
| GS | General budgetary expenditures (thousands of RMB) | EPS China Regional Economic Database |
| Government service efficiency | China's City Government-Business Relationship Ranking 2018 |
| HR | Average Wage Level (yuan) | Wind database |
| Number of Students in Higher Education Institutions (Individuals) | EPS China Regional Economic Database |
| The number of employed people at the end of the year (in ten thousand persons) |
| FS | Efficiency of Private Financing (in RMB per 10,000 yuan) | Wind database |
| Overall Financing Efficiency (per 10,000 yuan) |
| PS | Per Capita Road Area (Square Meters per Person) | EPS China Regional Economic Database |
| Water supply capacity (10,000 tons) |
| Gas supply capacity (million cubic meters) |
| Electricity supply capacity (million kWh) |
| Health services (sheets per 10,000 persons) |
| ME | GDP per capita (yuan) | EPS China Regional Economic Database |
| Total investment in fixed assets ($ million) |
| Amount of foreign capital actually utilized during the year (million yuan) |
| IE | Science expenditures ($ million) | EPS China Regional Economic Database |
| Innovative capacity index | Evaluation Report of China's Regional Innovation Capacity 2018 |

**4.Robust test**

We conducted a robustness test on the configurations of high-level TIE and non-high-level TIE. As fsQCA, which was employed in this study, is a methodological approach based on combinatorial mathematics, slight changes in the operations that result in a subset relationship among the outcomes without altering the configurations proposed in the study are considered robust (Du et al., 2022). Robustness tests commonly involve four approaches, including raising the consistency threshold, enhancing PRI consistency, adding or removing cases, and adding other conditions. Typically, one of the four robustness test methods can be chosen for the robustness test. In this study, we chose to raise the case consistency threshold from 0.8 to 0.85. In the high-level TIE configuration path, the configuration structure remained unchanged, with the coverage of solutions decreasing from 0.663 to 0.631. In the low-level TIE configuration path, the configuration structure also remained unchanged, with the coverage of solutions decreasing from 0.345 to 0.314. The robustness test results indicate that the configuration structure and related parameters are largely consistent with the aforementioned analysis results, confirming the robustness of these findings.

1. **Background Information on the Business Environment**

Due to word limit constraints, detailed information is provided in the appendix. In fact, many countries around the world have already started optimizing the business environment for tourism in order to improve tourism efficiency and increase investment in tourism projects. China, with its vast territory and significant regional resource disparities, has seen incomplete statistics showing that 22 provinces and municipalities have already introduced relevant policies or measures. Therefore, how to optimize the business environment and the mindset required for such optimization are issues that deserve the attention of numerous researchers.

| 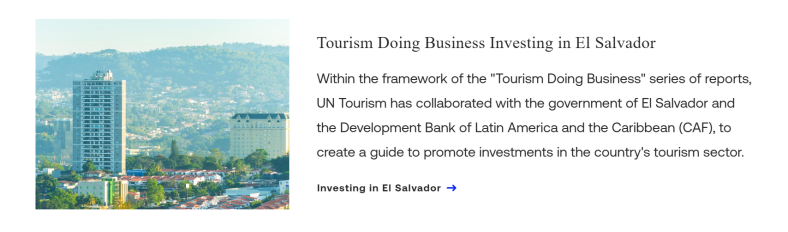 | 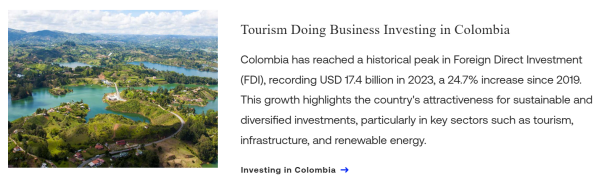 |
| --- | --- |
| 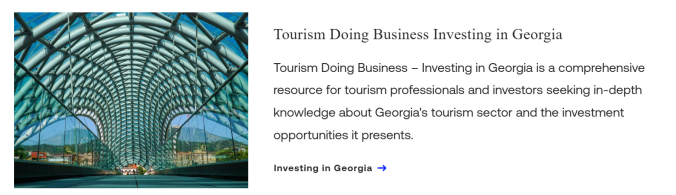 | 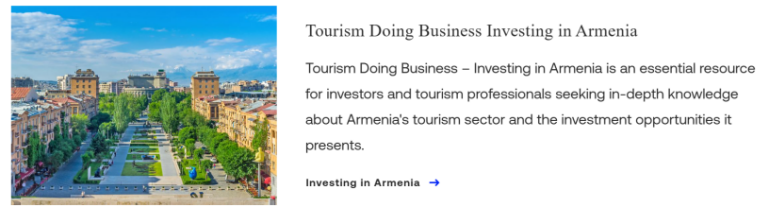 |
| 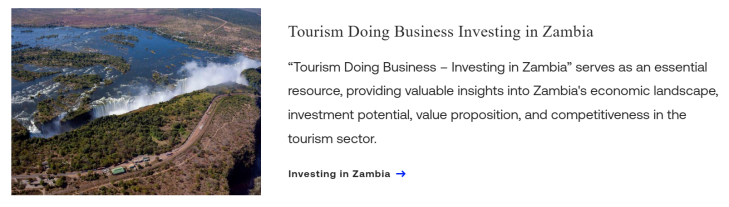 | 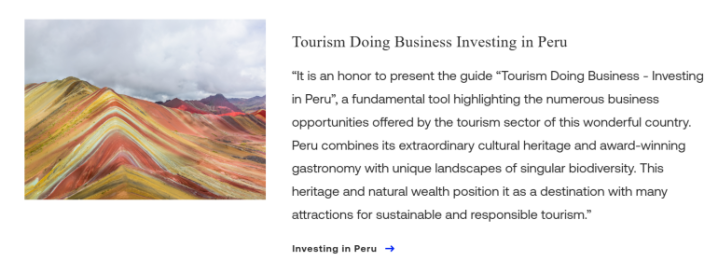 |
| 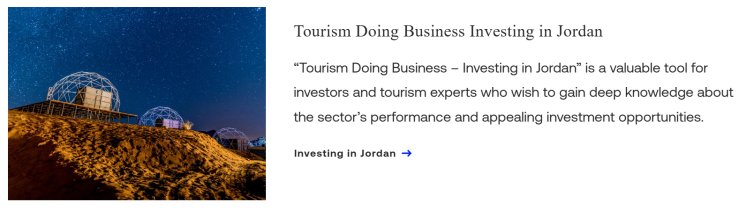 | 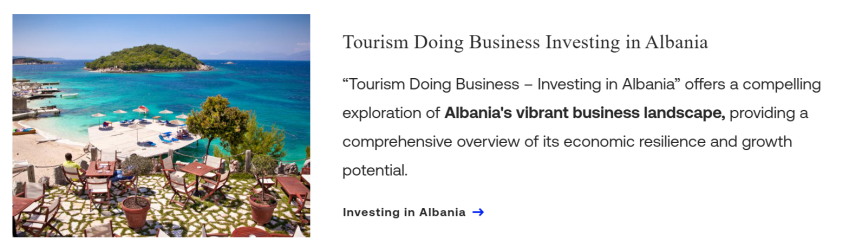 |
| 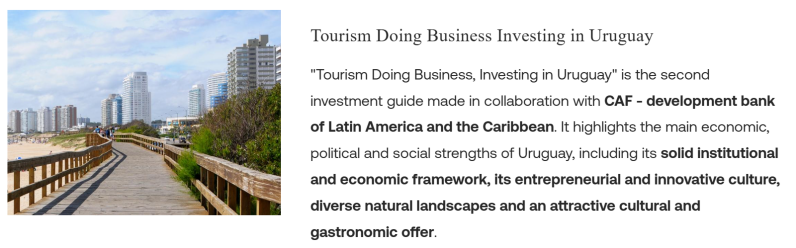 | 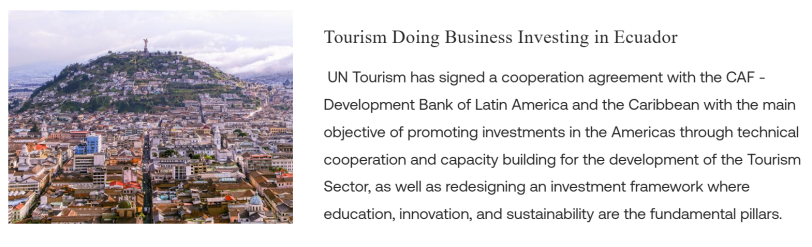 |
| 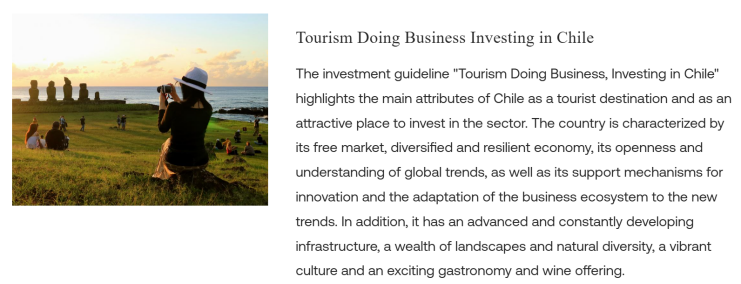 | 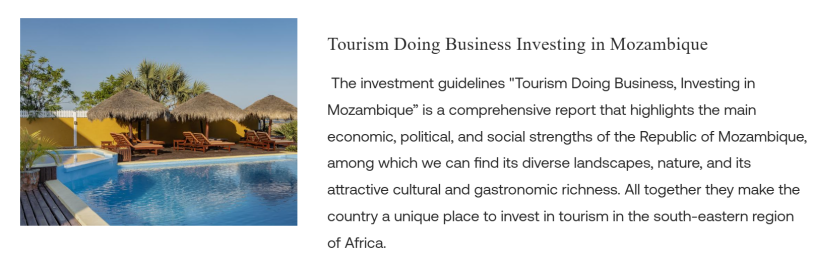 |
| 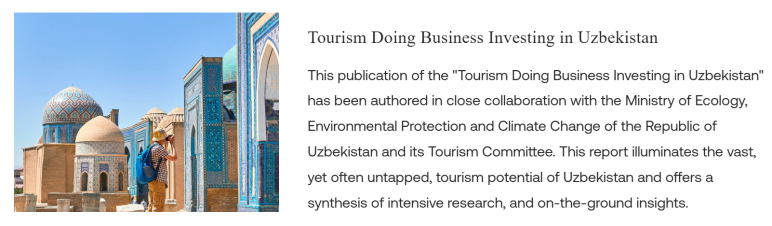 | 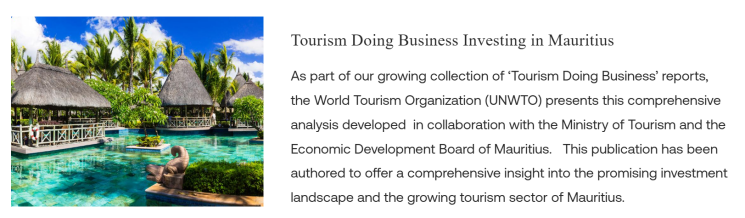 |
| 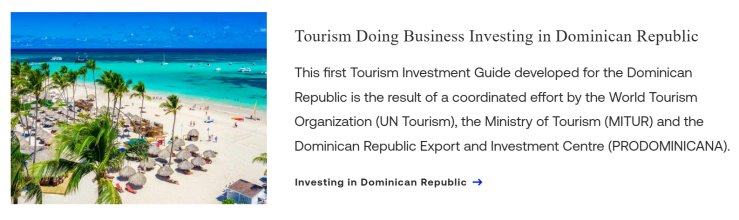 | 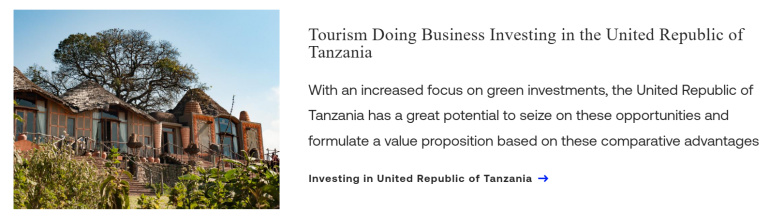 |

Note: Information source: https://www.unwto.org/investment/business-investing

China's Tourism Business Environment Practices

| Area | Initiatives or policy documents related to the business environment for tourism |
| --- | --- |
| Beijing | https://whlyj.beijing.gov.cn/ztzl/business/202405/t20240508_3665102.html |
| liaoning | https://whly.ln.gov.cn/whly/zfxxgk/zc/xzgfxwj/2024091415135865299/ |
| Xinjiang | https://wlt.xinjiang.gov.cn/wlt/yfzl/202408/700285f5df1c413b9fbc7fc75c1fd9c0.shtml |
| Ningxia | https://www.baidu.com/link?url=nAwhrI_nrcgBMlmHT9c46iu34YfgojMuKbS4iwtlH78cOfWhGCYdV-VUamPfUWT3q84ujWZoKA8uvNTI42m5UHsLRwbbV-bqhjM7bN0XXWa&wd=&eqid=d1bc67f4000ba732000000066762728a |
| Qinghai | https://www.baidu.com/link?url=r-rQdVw7AaJVQZ0ubjBJrgW0qTHtnGnSTohjU1OcRGFMV9aix8oVo6spgcqAExsHNBom_KGgZnU9L7XAXv8-1_&wd=&eqid=f107b3cd0099ba0d00000006676272b4 |
| Gansu | https://www.tianshui.gov.cn/wlj/info/2122/262862.htm |
| Yunnan | https://baijiahao.baidu.com/s?id=1730615989684947850&wfr=spider&for=pc |
| Sichuan | http://sc.people.com.cn/n2/2024/0817/c345167-40947002.html |
| Chongqing | https://www.baidu.com/link?url=PFXzJgf5NsnULppNSnkQCdPcImU0LvwHbzBuvw2clF4xX3Cgpdi2j6Dz5LSHuZyx8fk_MGh-FmTRseFZqZZVShb3wSIL6i5BN-kVNVNqtYy&wd=&eqid=d182b88e003c88260000000667627397 |
| Guangxi | https://nnsw.nanning.gov.cn/zt/yhyshj/t6190202.html |
| Inner mongolia | https://www.baidu.com/link?url=ATmC8TkuUxpdw3dpW4m2gBT8CbaoEfCBp-NxHwZDtIKEGppEfZsbntn-p_S5YQeqq2JK6z0dN4Qisn_8gT-KxFxAlRz5Hu_v4Xk9L8IesaC&wd=&eqid=d68a6b6f006cde86000000066762740c |
| Hubei | https://wlt.hubei.gov.cn/bmdt/mtjj/202209/t20220930_4330567.shtml |
| Henan | https://hct.henan.gov.cn/2024/06-10/3005729.html |
| Jiangxi | https://www.mct.gov.cn/whzx/qgwhxxlb/jx/202306/t20230620_944612.htm |
| Hainan | https://www.hainan.gov.cn/hainan/yhyshj/yhyshj.shtml |
| Guangdong | https://www.hainan.gov.cn/hainan/yhyshj/yhyshj.shtml |
| Fujian | https://wlt.fujian.gov.cn/wldt/btdt/202409/t20240924_6528327.htm |
| Jiangsu | https://www.mct.gov.cn/whzx/qgwhxxlb/js/202205/t20220531_933262.htm |
| Shanghai | https://www.sohu.com/a/288889523_384507 |
| Hebei | https://whly.hebei.gov.cn/c/2023-09-25/574020.html |
| Tianjin | https://whly.tj.gov.cn/ZTZL719/yhyshj/ |
